# Supplementary material for: Defective Fe3+ self-doped spinel ZnFe2O4 with oxygen vacancies for highly efficient photoelectrochemical water splitting
Source: Royal Society of Chemistry journal article supplement (doi:10.1039/c9dt01033e), 2019-01-01
Supplement: c9dt01033e1.pdf [file c9dt01033e1.pdf]

## Electronic Supporting Information

### Defective Fe<sup>3+</sup> self-doped spinel ZnFe<sub>2</sub>O<sub>4</sub> with oxygen vacancies for highly efficient electrochemical water splitting

Jianmin Wang<sup>1‡</sup>, Yunan Wang<sup>1‡</sup>, Xinchao Xv<sup>1</sup>, Yan Chen<sup>1</sup>, Xi Yang<sup>1</sup>, Jun Zhou<sup>1</sup>, Song Li<sup>1</sup>, Feng Cao<sup>\*1</sup>, Gaowu Qin<sup>\*1,2</sup>

<sup>1</sup>Key Laboratory for Anisotropy and Texture of Materials (Ministry of Education), School of Material Science and Engineering, Northeastern University, Shenyang 110819, China

<sup>2</sup>Research Center for Metallic Wires, Northeastern University, Shenyang 110819, China

\*caof@atm.neu.edu.cn

\*qingw@smm.neu.edu.cn

‡ These authors contributed equally.

## Experimental section

### Preparation of samples

Pure ZnFe<sub>2</sub>O<sub>4</sub> photoanodes were synthesized by a fast and effective spin-coating method. In a typical process, 1 mM of Zn(NO<sub>3</sub>)<sub>2</sub> and 2 mM of Fe(NO<sub>3</sub>)<sub>3</sub>·9H<sub>2</sub>O dissolved in a mixed solution containing ethanol and DI water. And then 1 g of PEG-400 was added into the solution with stirring for 30 min. To create films, the precursor solutions were spin coated onto FTO substrates with spun for 20 s at 3000 rpm. And the films were subsequently annealed in air at 600 °C for 2 h.

Fe<sup>3+</sup> self-doped ZnFe<sub>2</sub>O<sub>4</sub> photoanodes with different doping concentrations were synthesized through constructing non-stoichiometric ZnFe<sub>2</sub>O<sub>4</sub> and varying the ratio of Zn/Fe, and subsequent the same process with that of pure ZnFe<sub>2</sub>O<sub>4</sub>. Moreover, the samples with Zn/Fe=0.9/2.1, 0.93/2.07, 0.96/2.04 and 0.99/2.01 were successfully prepared and labeled as (Zn<sub>1-x</sub>Fe<sub>x</sub>)Fe<sub>2</sub>O<sub>4</sub> (x=0.1), (Zn<sub>1-x</sub>Fe<sub>x</sub>)Fe<sub>2</sub>O<sub>4</sub> (x=0.07), (Zn<sub>1-x</sub>Fe<sub>x</sub>)Fe<sub>2</sub>O<sub>4</sub> (x=0.04) and (Zn<sub>1-x</sub>Fe<sub>x</sub>)Fe<sub>2</sub>O<sub>4</sub> (x=0.01), respectively. Notably, (Zn<sub>1-x</sub>Fe<sub>x</sub>)Fe<sub>2</sub>O<sub>4</sub> (x=0.1) was taken as an example to exhibit the advantages of self-doping treatment for photoelectrochemical performances of materials. So, (Zn<sub>1-x</sub>Fe<sub>x</sub>)Fe<sub>2</sub>O<sub>4</sub> mentioned in the paper without specific x value refers to (Zn<sub>1-x</sub>Fe<sub>x</sub>)Fe<sub>2</sub>O<sub>4</sub> (x=0.1).

ZnFe<sub>2</sub>O<sub>4</sub> with oxygen vacancies were fabricated via subsequent hydrogen reduction treatment at 200 °C under a flow of 5% H<sub>2</sub> and 95% Ar for 30 min for initial

ZnFe<sub>2</sub>O<sub>4</sub> or Fe<sup>3+</sup> self-doped ZnFe<sub>2</sub>O<sub>4</sub>, which were labeled as ZnFe<sub>2</sub>O<sub>4-y</sub> and (Zn<sub>1-x</sub>Fe<sub>x</sub>)Fe<sub>2</sub>O<sub>4-y</sub>, respectively. Moreover, to vary the concentrations of the oxygen vacancies, the hydrogen reduction treatment was also carried out for 10 min, 60 min and 120 min, respectively. Notably, ZnFe<sub>2</sub>O<sub>4-y</sub>-30 min and (Zn<sub>1-x</sub>Fe<sub>x</sub>)Fe<sub>2</sub>O<sub>4-y</sub>-30 min were taken as examples to exhibit the advantages of oxygen vacancies for photoelectrochemical performances of materials. So, ZnFe<sub>2</sub>O<sub>4-y</sub> and (Zn<sub>1-x</sub>Fe<sub>x</sub>)Fe<sub>2</sub>O<sub>4-y</sub> mentioned in the paper without specific hydrogen reduction treatment durations refer to ZnFe<sub>2</sub>O<sub>4-y</sub>-30 min and (Zn<sub>1-x</sub>Fe<sub>x</sub>)Fe<sub>2</sub>O<sub>4</sub>-30 min.

### **Characterizations**

The structures of the samples were measured by X-ray diffraction (XRD, Rigaku-D/max 2500V, Cu K $\alpha$  radiation). The morphologies were observed by using field emission scanning electron microscopy (FE-SEM, JEOL JEM-7100F). The optical abilities were measured via UV visible spectrophotometer with an integrating sphere (PerkinElmer Lambda 750S) in the range of 400-800 nm. The composition and surface electronic state of elements were investigated by X-ray photoelectron spectroscopy (XPS).

### **PEC performance measurements**

PEC properties were evaluated with a standard three electrodes system with Hg/HgO as the reference electrode, Pt mesh as counter electrode and the as-prepared photoanode as working electrode. A 1 M NaOH aqueous solution after saturated with nitrogen gas for 30 min was used as electrolytes. A 300W xenon lamp (Perfect Light, PLS-SXE300) with an AM1.5 filter was used to simulate the solar irradiation spectra, and the power was calibrated to 100 mW cm<sup>-2</sup>. The applied voltage was swept in the range of 0.5-1.7 V *vs.* RHE with a scan rate of 10 mV s<sup>-1</sup>. Mott-Schottky analysis was performed by sweeping the range of 0.4-1.0 V *vs.* RHE with an AC frequency of 10 kHz and an amplitude of 10 mV under dark condition. The electrochemical impedance spectroscopy (EIS) was measured at a DC potential of 1.23 V *vs.* RHE and in the AC potential frequency range of 100 kHz-100 mHz with an amplitude of 10 mV. O<sub>2</sub> evolution experiment was conducted at 1.23 V *vs.* RHE under AM1.5 illumination in 1 M NaOH. The amounts of evaluated O<sub>2</sub> were measured via Dissolved oxygen meters.

It is worthwhile to note that the electrolyte should be bubbled with highly pure  $N_2$  for 30 min to remove the dissolved oxygen before the measurement, and the cell should be carefully sealed.

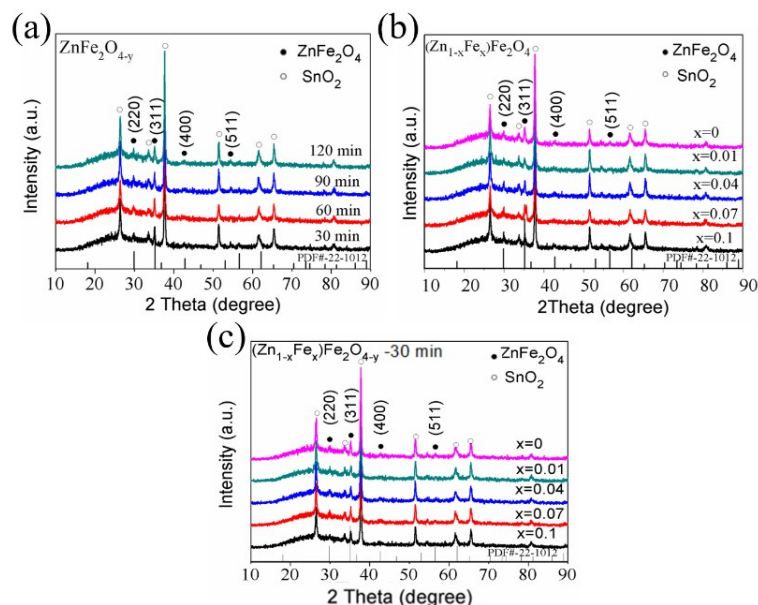

Fig. S1 XRD patterns of (a) obtained samples of  $ZnFe_2O_4$  with hydrogen reduction treatment for different durations, (b)  $ZnFe_2O_4$  with different  $Fe^{3+}$  self-doped concentrations and (c) obtained samples of  $ZnFe_2O_4$  with different  $Fe^{3+}$  self-doped concentrations and subsequent hydrogen reduction treatment for 30 min.

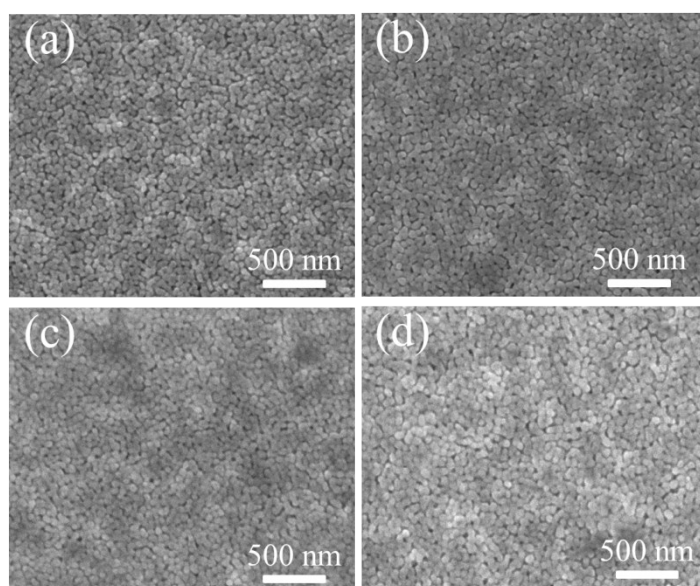

Fig. S2 SEM images of (a)  $ZnFe_2O_{4-y}$ -10 min, obtained samples of  $ZnFe_2O_4$  with hydrogen reduction treatment for 10 min, (b)  $(Zn_{1-x}Fe_x)Fe_2O_4$ ,  $Fe^{3+}$  self-doped  $ZnFe_2O_4$  through varying the ratio of Zn/Fe from 1/2 ( $x=0$ ) to 0.93/2.07 ( $x=0.07$ ), (c)  $(Zn_{1-x}Fe_x)Fe_2O_{4-y}$ -30 min, obtained samples of  $ZnFe_2O_4$  with hydrogen reduction treatment for 30 min, and (d)  $(Zn_{1-x}Fe_x)Fe_2O_{4-y}$ -30 min, obtained samples of  $ZnFe_2O_4$  with hydrogen reduction treatment for 30 min.

$x\text{Fe}_x\text{Fe}_2\text{O}_{4-y}$ -30 min ( $x=0.07$ ) and (d)  $(\text{Zn}_{1-x}\text{Fe}_x)\text{Fe}_2\text{O}_4$ -60 min ( $x=0.04$ ).

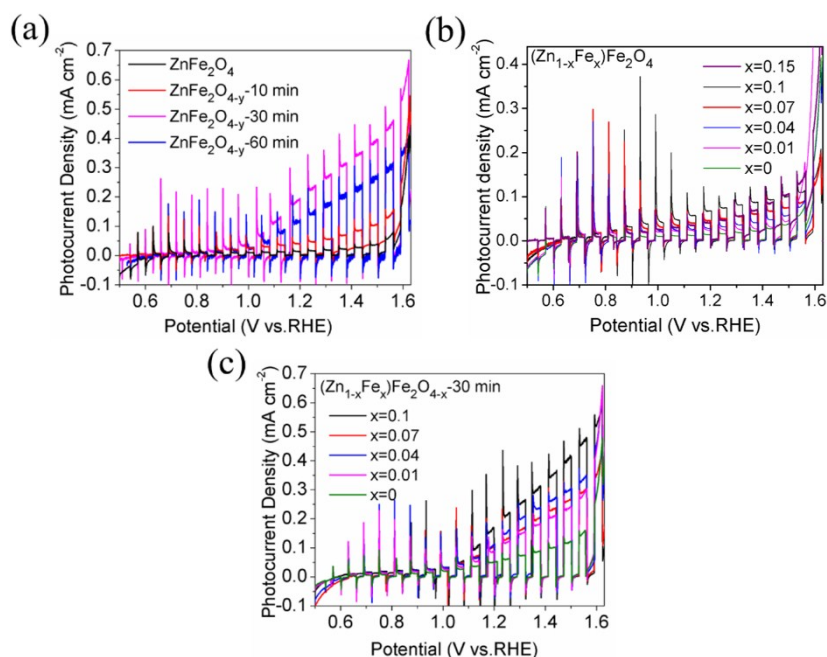

Fig. S3 (a) Photocurrent density-potential curves of ZnFe<sub>2</sub>O<sub>4</sub> with different oxygen vacancy concentrations through varying the hydrogen reduction treatment durations. (b) Photocurrent density of ZnFe<sub>2</sub>O<sub>4</sub> with different Fe<sup>3+</sup> self-doping concentrations. (c) Photocurrent density of ZnFe<sub>2</sub>O<sub>4</sub> with different Fe<sup>3+</sup> self-doping concentrations and hydrogen reduction treatment for 30 min, respectively.

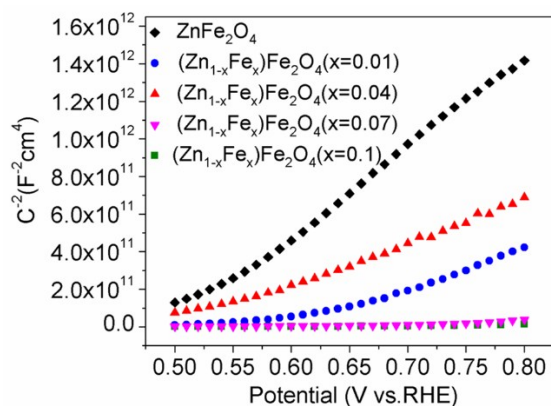

Fig. S4 Mott-Schottky plots of ZnFe<sub>2</sub>O<sub>4</sub> with different Fe<sup>3+</sup> self-doping concentrations obtained at the frequency of 1 kHz and amplitude of 0.01 V under dark conditions.

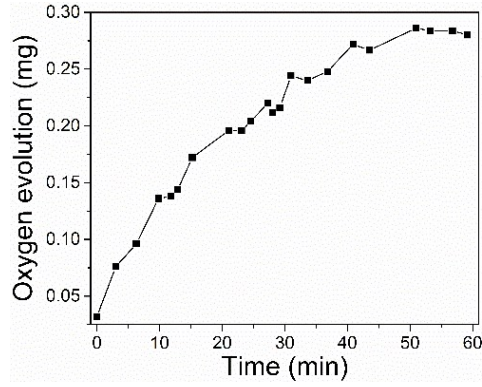

Figure S5 The time course of  $O_2$  evolution over the as-prepared  $(Zn_{1-x}Fe_x)Fe_2O_{4-y}$  ( $x=0.1$ ).

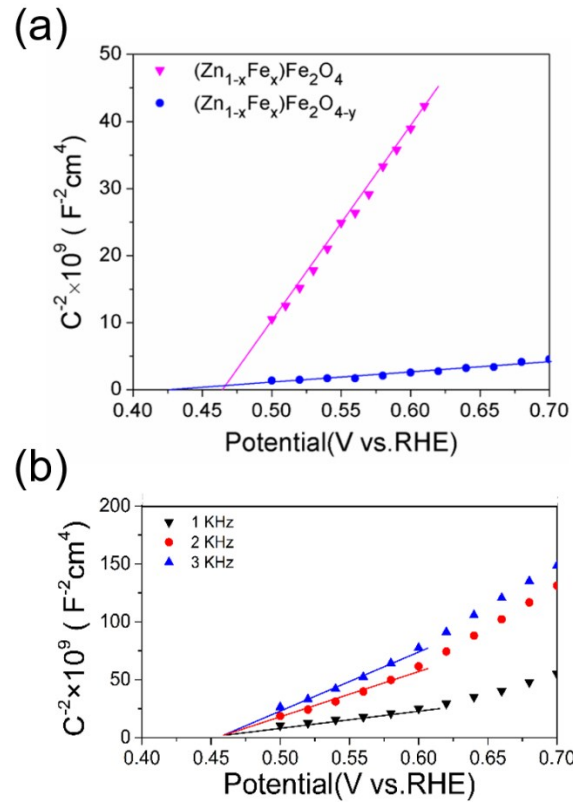

Figure S6 (a) A zoom of traces of  $(Zn_{1-x}Fe_x)Fe_2O_4$  and  $(Zn_{1-x}Fe_x)Fe_2O_{4-y}$  in the Mott-Schottky plots. (b) The Mott-Schottky plots of  $(Zn_{1-x}Fe_x)Fe_2O_4$  measured at different frequencies.
